# Supplementary material for: Facile synthesis of Co3−xMnxO4/C nanocages as an efficient sulfur host for lithium–sulfur batteries with enhanced rate performance
Source: Royal Society of Chemistry journal article supplement (doi:10.1039/d0dt01620a), 2020-01-01
Supplement: d0dt01620a1.pdf [file d0dt01620a1.pdf]

## Support information

### Facile synthesis of $\text{Co}_3\text{S}_4$

### $\text{Mn}_x\text{O}_4/\text{C}$ nanocages as an efficient sulfur host for lithium-sulfur batteries with enhanced rate performance

Zexian Zhang, Shiyuan Zhou, Tao Mei,\* Yanzhuo Gou, Fanxuan Xie, Chengcheng

Liu, Xianbao Wang\*

Hubei Collaborative Innovation Center for Advanced Organic Chemical Materials,  
Key Laboratory for the Green Preparation and Application of Functional Materials,  
Hubei Key Laboratory of Polymer Materials, School of Materials Science and  
Engineering, Hubei University, Wuhan 430062, PR China. E-mail:  
meitao@hubu.edu.cn (T.Mei); Tel: +86-27-8866 2132, Fax: +86-27- 8866 1729

## Contents

### 1. Figures:

Figure. S1 (a) XRD pattern of  $\text{Co}_{3-x}\text{Mn}_x\text{O}_4/\text{C}$  nanocages. (b) The XPS pattern of N in  $\text{Co}_{3-x}\text{Mn}_x\text{O}_4/\text{C}/\text{S}$ .

Figure. S2 XPS pattern of  $\text{Co}_{3-x}\text{Mn}_x\text{O}_4/\text{C}$  nanocages.

Figure. S3 Equivalent circuit of battery contained  $\text{Co}_{3-x}\text{Mn}_x\text{O}_4/\text{C}/\text{S}$  electrodes at 5 C.

Figure. S4  $\text{N}_2$  adsorption-desorption isotherm curves of  $\text{Co}_{3-x}\text{Ni}_x\text{O}_4/\text{C}$  nanocages.

Figure. S5 (a) Discharge capacity of the  $\text{Co}_{3-x}\text{Mn}_x\text{O}_4/\text{C}$  nanocages/S and Discharge capacity of the  $\text{Co}_{3-x}\text{Ni}_x\text{O}_4/\text{C}$  nanocages/S electrodes electrodes cycled at rate of 2 C, and the corresponding photos (inset). (b) Discharge capacity of the  $\text{Co}_{3-x}\text{Mn}_x\text{O}_4/\text{C}$  nanocages/S electrodes cycled with S loading of  $3.5 \text{ mg cm}^{-2}$ . (c) Discharge capacity of the  $\text{Co}_{3-x}\text{Mn}_x\text{O}_4/\text{C}$  nanocages/S with S loading of  $3.2 \text{ mg cm}^{-2}$ .

Figure. S6 CV tested between 1.7 and 2.8 V at a sweep rate of  $0.1 \text{ mV s}^{-1}$  for  $\text{Co}_{3-x}\text{Ni}_x\text{O}_4/\text{C}/\text{S}$ .

Figure. S7 Equivalent circuit of battery contained  $\text{Co}_{3-x}\text{Ni}_x\text{O}_4/\text{C}/\text{S}$  electrodes at 2 C.

Figure. S8 The XPS pattern of  $\text{Co}_{3-x}\text{Mn}_x\text{O}_4/\text{C}$  nanocages after absorbing  $\text{Li}_2\text{S}_4$ : (a) Mn2p; (b) Co2p.

Figure. S9 (a) The XPS pattern of S after absorbing test. (b) UV-vis spectra of supernatant of  $\text{Li}_2\text{S}_4$  solution after the adsorption test. (c) Schematic illustration of  $\text{Co}_{3-x}\text{Mn}_x\text{O}_4$  promoting the conversion of lithium polysulfides (LiPSs). (d) Schematic illustration of anchoring effect comparison.

Figure. S10 The FESM images of  $\text{Co}_{3-x}\text{Ni}_x\text{O}_4/\text{C}/\text{S}$  after running for (a) 100 cycles and (d) 200 cycles at a rate of 2 C in coin cells.

## 2. Tables:

Table. S1 EDS of a single  $\text{Co}_{3-x}\text{Mn}_x\text{O}_4/\text{C}$  nanocage.

Table. S2 Parameters of the every part of an analog circuit of  $\text{Co}_{3-x}\text{Mn}_x\text{O}_4/\text{C}/\text{S}$ .

Table. S3 Parameters of the every part of an analog circuit of  $\text{Co}_{3-x}\text{Ni}_x\text{O}_4/\text{C}/\text{S}$ .

Table. S4 Summary of electrochemical performance of various ZIF-67 derived nanocages and  $\text{Co}_3\text{O}_4$  in LSBs.

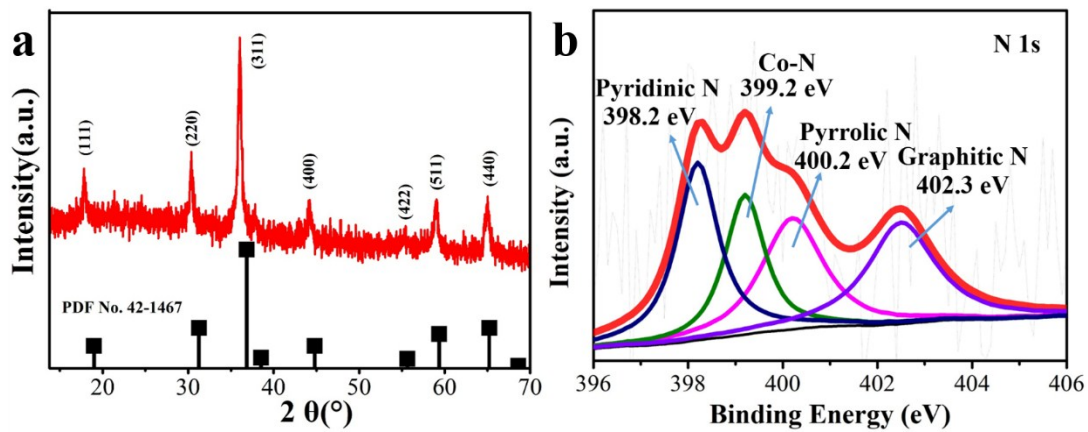

**Fig. S1** (a) XRD pattern of  $\text{Co}_{3-x}\text{Mn}_x\text{O}_4/\text{C}$  nanocages. (b) The XPS pattern of N in  $\text{Co}_{3-x}\text{Mn}_x\text{O}_4/\text{C}/\text{S}$ .

| Element | Mass percent (wt%) | Atomic percentage (%) |
|---------|--------------------|-----------------------|
| O       | 38.9               | 47.1                  |
| Co      | 30.0               | 9.9                   |
| C       | 20.2               | 32.6                  |
| N       | 6.4                | 8.9                   |
| Mn      | 4.5                | 1.6                   |

**Table. S1** EDS of a single  $\text{Co}_{3-x}\text{Mn}_x\text{O}_4/\text{C}$  nanocage.

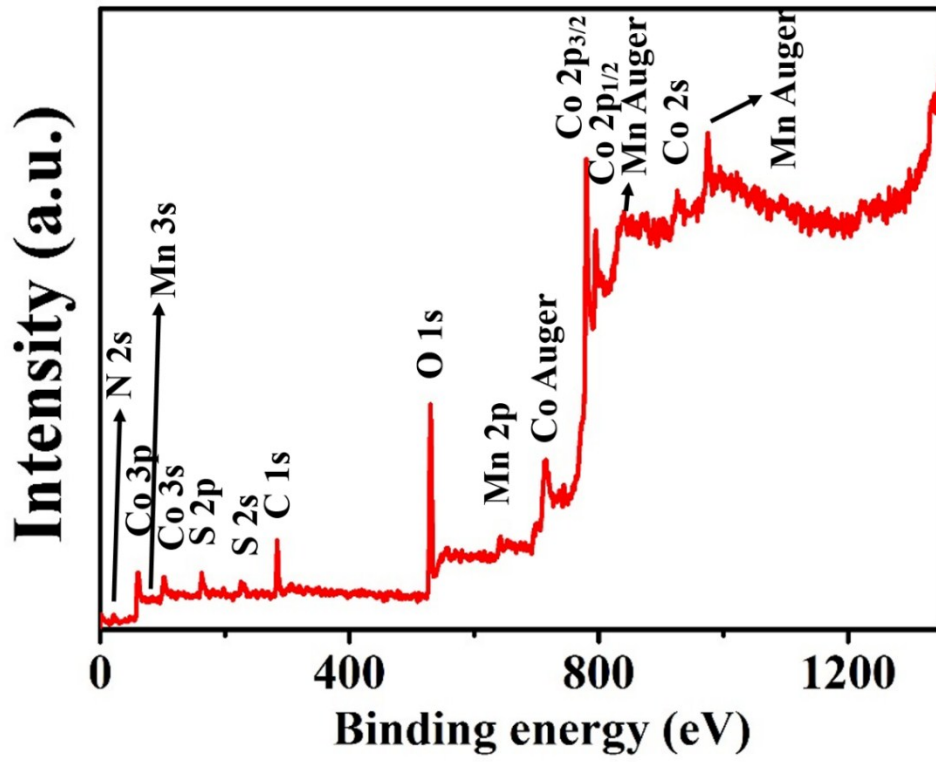

Fig. S2 XPS pattern of Co<sub>3-x</sub>Mn<sub>x</sub>O<sub>4</sub>/C nanocages.

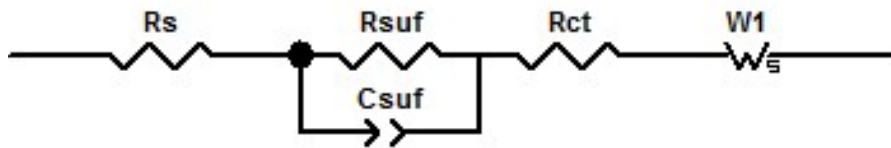

**Fig. S3** Equivalent circuit of battery contained  $\text{Co}_{3-x}\text{Mn}_x\text{O}_4/\text{C}/\text{S}$  electrodes at 5 C.

| Cycle Number | $R_s$ | $R_{suf}$ | $R_{ct}$ |
|--------------|-------|-----------|----------|
| 1 st         | 4.9   | 72.7      | 71.3     |
| 10 th        | 10.2  | 95.8      | 82.6     |
| 100 th       | 13.3  | 256.3     | 266.3    |
| 500 th       | 15.1  | 357.0     | 370.3    |

**Table. S2** Parameters of the every part of an analog circuit of  $\text{Co}_{3-x}\text{Mn}_x\text{O}_4/\text{C}/\text{S}$ .

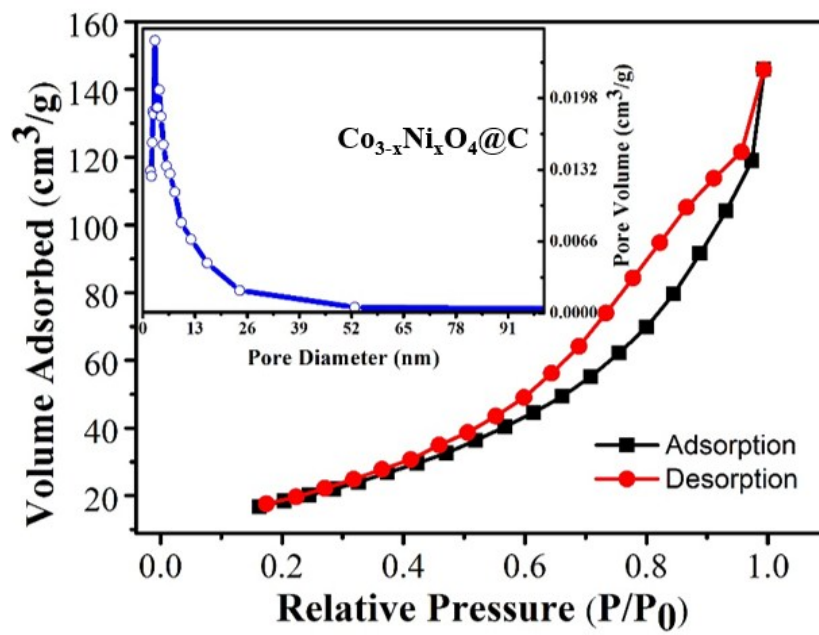

**Fig.S4**  $\text{N}_2$  adsorption-desorption isotherm curves of  $\text{Co}_{3-x}\text{Ni}_x\text{O}_4/\text{C}$  nanocages.



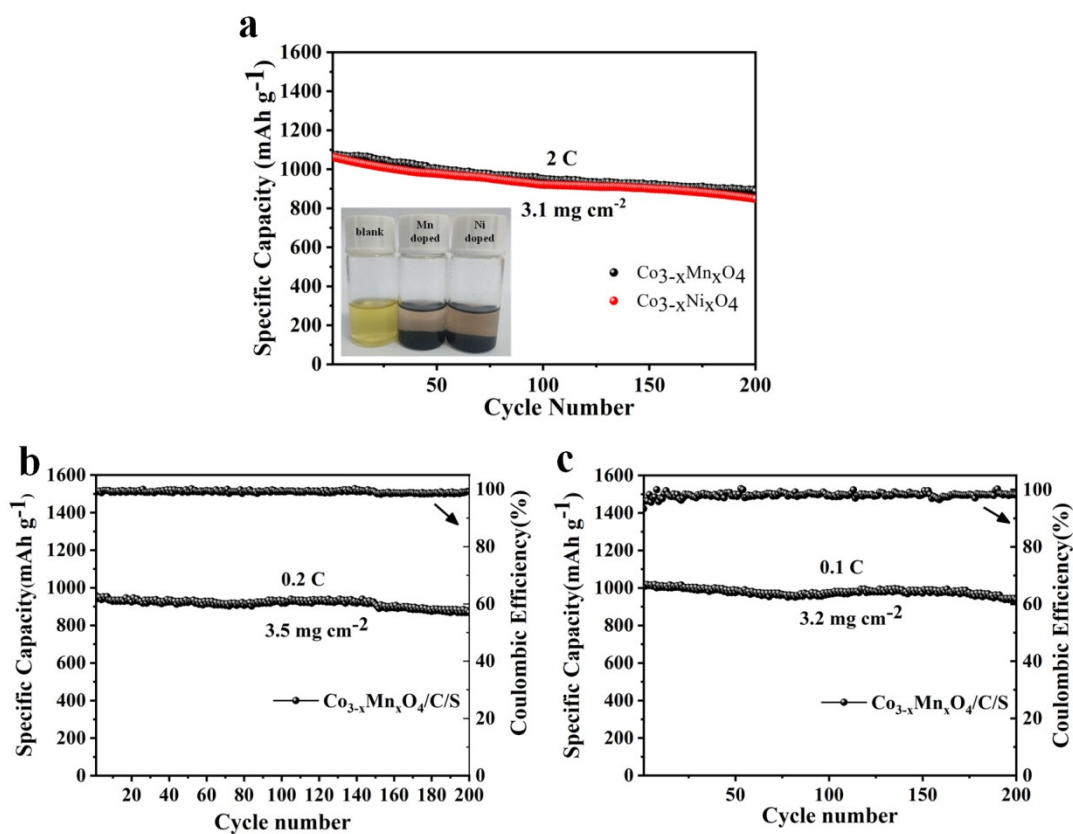

**Fig. S5** (a) Discharge capacity of the Co<sub>3-x</sub>Mn<sub>x</sub>O<sub>4</sub>/C nanocages/S and Discharge capacity of the Co<sub>3-x</sub>Ni<sub>x</sub>O<sub>4</sub>/C nanocages/S electrodes electrodes cycled at rate of 2 C, and the corresponding photos (inset). (b) Discharge capacity of the Co<sub>3-x</sub>Mn<sub>x</sub>O<sub>4</sub>/C nanocages/S electrodes cycled with S loading of 3.5 mg cm<sup>-2</sup>. (c) Discharge capacity of the Co<sub>3-x</sub>Mn<sub>x</sub>O<sub>4</sub>/C nanocages/S with S loading of 3.2 mg cm<sup>-2</sup>.

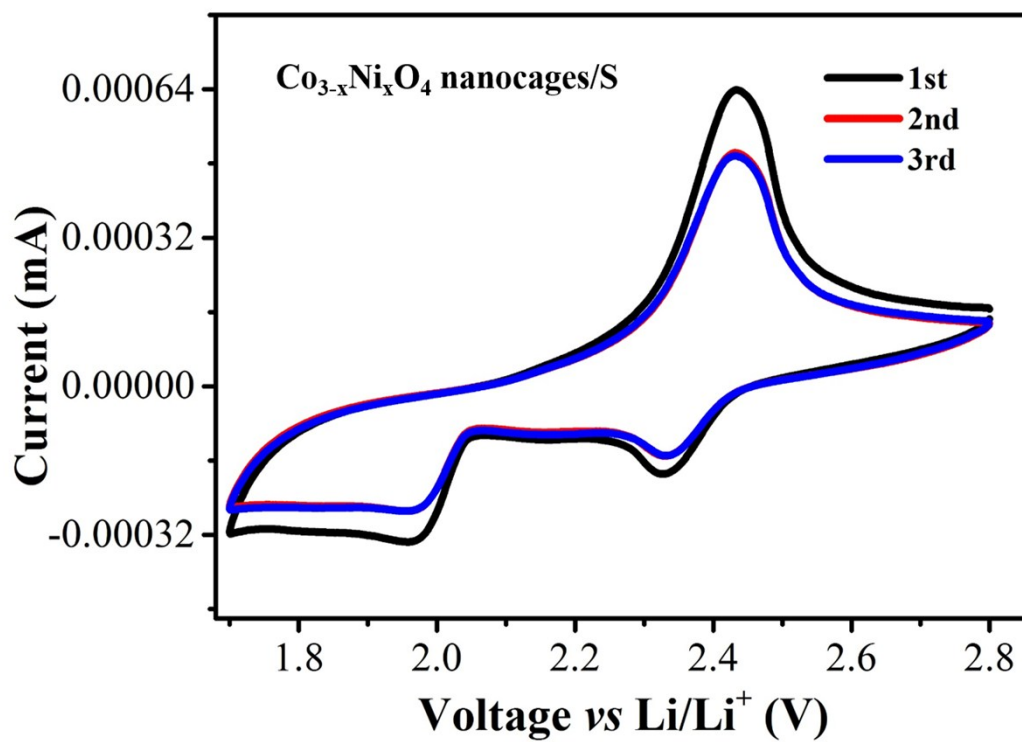

**Fig. S6** CV tested between 1.7 and 2.8 V at a sweep rate of 0.1 mV s<sup>-1</sup> for Co<sub>3-x</sub>Ni<sub>x</sub>O<sub>4</sub>/C/S.

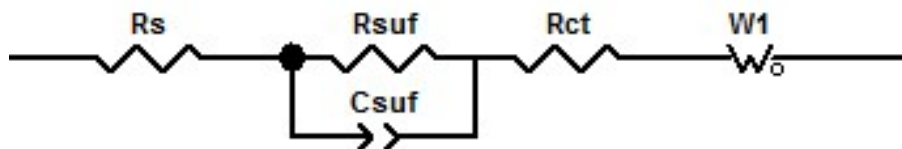

**Fig. S7** Equivalent circuit of battery contained  $\text{Co}_{3-x}\text{Ni}_x\text{O}_4/\text{C}/\text{S}$  electrodes at 2 C.

| Cycle Number | $R_s$ | $R_{suf}$ | $R_{ct}$ |
|--------------|-------|-----------|----------|
| 1 st         | 10.5  | 97.0      | 66.7     |
| 200 th       | 25.8  | 515.3     | 520.5    |

**Table. S3** Parameters of the every part of an analog circuit of  $\text{Co}_{3-x}\text{Ni}_x\text{O}_4/\text{C}/\text{S}$ .

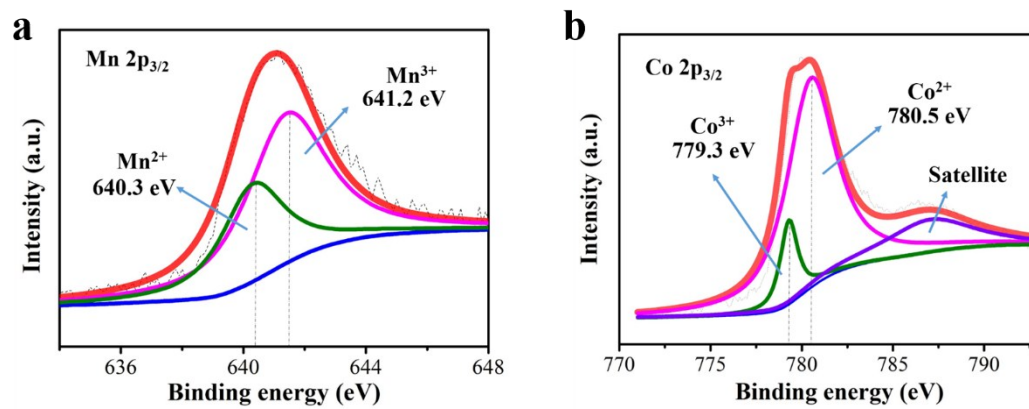

**Fig. S8** The XPS pattern of Co<sub>3-x</sub>Mn<sub>x</sub>O<sub>4</sub>/C nanocages after absorbing Li<sub>2</sub>S<sub>4</sub>: (a) Mn2p;  
(b) Co2p.

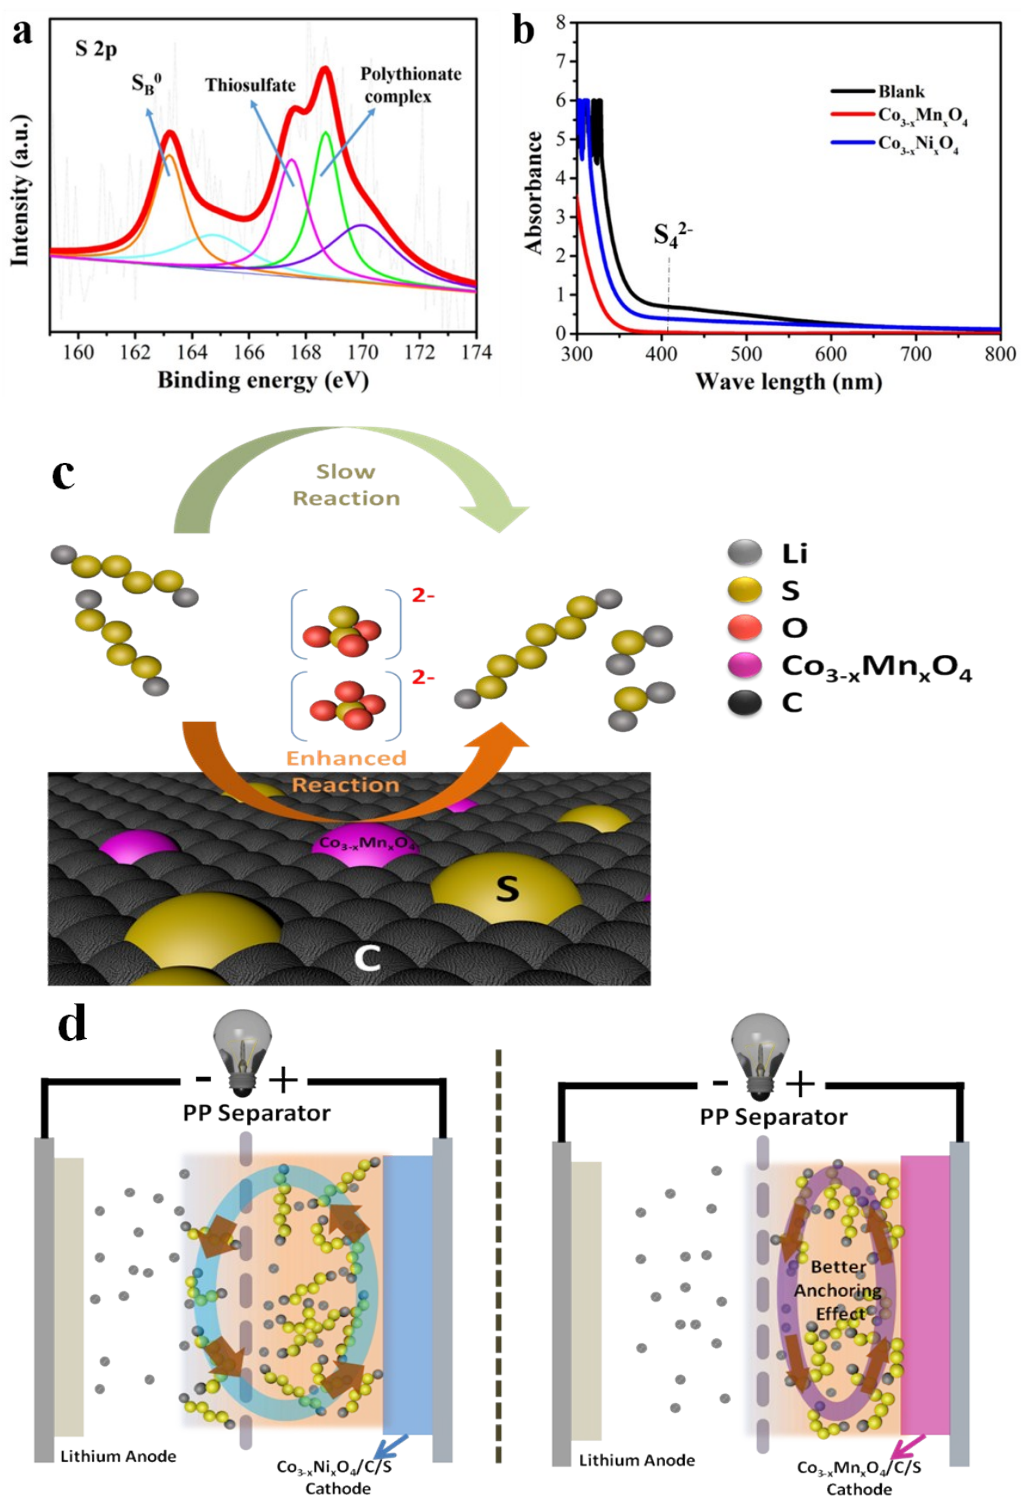

**Fig. S9** (a) The XPS pattern of S after absorbing test. (b) UV-vis spectra of supernatant of  $Li_2S_4$  solution after the adsorption test. (c) Schematic illustration of  $Co_{3-x}Mn_xO_4$  promoting the conversion of lithium polysulfides (LiPSs). (d) Schematic illustration of anchoring effect comparison.

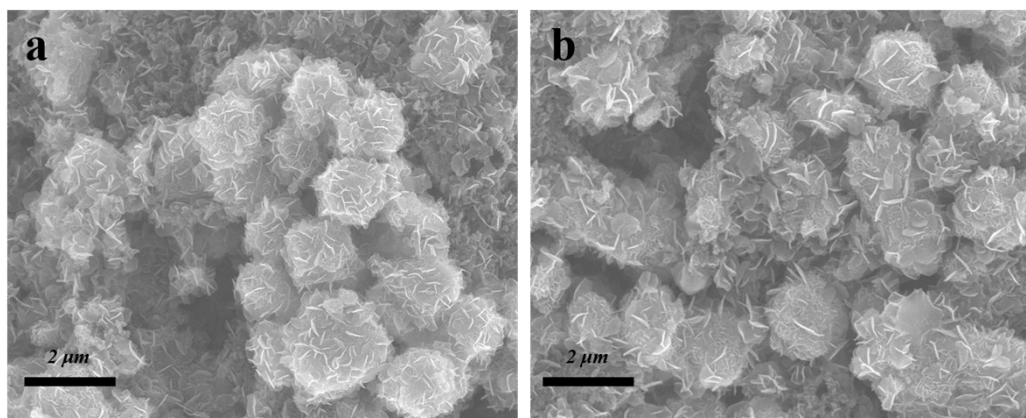

**Fig. S10** The FESM images of  $\text{Co}_{3-x}\text{Ni}_x\text{O}_4/\text{C}/\text{S}$  after running for (a) 100 cycles and (d) 200 cycles at a rate of 2 C in coin cells.

| Matrix                                                       | Areal sulfur loading (mg cm <sup>-2</sup> ) | Sulfur content (wt%)   | Final capacity (mAh g <sup>-1</sup> ) | Rate /current density | Capacity retention (%) | Cycle numbers | Rate performance (mAh g <sup>-1</sup> ) | Ref.      |
|--------------------------------------------------------------|---------------------------------------------|------------------------|---------------------------------------|-----------------------|------------------------|---------------|-----------------------------------------|-----------|
| Co <sub>3-x</sub> Mn <sub>x</sub> O <sub>4</sub> /C          | 1.3                                         | 66                     | 893                                   | 1 C                   | 82.5                   | 500           | 700 (3 C)<br>628 (5 C)<br>405 (10 C)    | This work |
| CNT@Co-N-C                                                   | 2.0                                         | 71                     | 970                                   | 0.2 C                 | 79.8                   | 500           | 620 (5 C)                               | 1         |
| N-Co <sub>3</sub> O <sub>4</sub> @N-C                        | 5.8                                         | —                      | 568                                   | 0.2 C                 | 46.4                   | 500           | 611 (2 C)                               | 2         |
| Co <sub>3</sub> O <sub>4</sub> /C nanocage                   | 1.4                                         | 70                     | 817                                   | 0.2 C                 | 75.9                   | 100           | 807 (1 C)<br>682 (2 C)                  | 3         |
| Co <sub>3</sub> O <sub>4</sub> polyhedron                    | 2.5                                         | —                      | 630                                   | 0.1 C                 | 55.6                   | 200           | 620 (4 C)                               | 4         |
| Co@C                                                         | 2.1                                         | 70                     | 790                                   | 0.2 C                 | 91.6                   | 220           | 712 (1 C)                               | 5         |
| RGO/C-Co                                                     | 1.0                                         | 59                     | 949                                   | 0.3 A g <sup>-1</sup> | 91.7                   | 300           | 479 (5 A g <sup>-1</sup> )              | 6         |
| Cobalt-graphitic carbon nanocages                            | 2.2-2.3                                     | 77                     | 833                                   | 0.5 C                 | 72.6                   | 500           | 718 (1 C)                               | 7         |
| C-Co-N                                                       | 2.0 (Li <sub>2</sub> S)                     | 52 (Li <sub>2</sub> S) | 929                                   | 0.2 C                 | 80.4                   | 300           | 898 (2 C)<br>604 (4 C)                  | 8         |
| Co <sub>3</sub> O <sub>4</sub> nanofiber                     | 1.3                                         | 72                     | 726                                   | 0.5 C                 | 79.3                   | 200           | 796 (1 C)                               | 9         |
| Co <sub>3</sub> O <sub>4</sub> nanoneedle                    | 4.1                                         | —                      | 987                                   | 0.5 C                 | 80.1                   | 200           | 476 (2 C)                               | 10        |
| Co <sub>3</sub> O <sub>4</sub> submicro-spheres              | 1.0                                         | 66                     | 805                                   | 0.2 C                 | 89.2                   | 100           | 428 (3 C)                               | 11        |
| TiO <sub>2</sub> /Co <sub>3</sub> O <sub>4</sub> nanocrystal | 1.5                                         | 54                     | 968                                   | 0.1 C                 | 85                     | 100           | 684 (1 C)                               | 12        |
| Co <sub>3</sub> O <sub>4</sub> -T nanotube                   | 1.0                                         | 78                     | 1081                                  | 100                   | 84.8                   | 50            | 492.3 (1000 mA g <sup>-1</sup> )        | 13        |
| Co <sub>3</sub> O <sub>4</sub> embedded carbon               | 5.2                                         | —                      | 930                                   | 0.2 A g <sup>-1</sup> | 88.5                   | 300           | 410 (3.2 A g <sup>-1</sup> )            | 14        |
| Co <sub>3</sub> O <sub>4-x</sub> microsphere                 | 2.0                                         | —                      | 1054                                  | 0.2 C                 | 83.9                   | 100           | 852 (2 C)<br>780 (3 C)                  | 15        |
| NiO-Co <sub>3</sub> O <sub>4</sub> hollow shell              | —                                           | 52                     | 713                                   | 1 C                   | 79.5                   | 200           | 827 (2 C)                               | 16        |

**Table. S4.** Summary of electrochemical performance of various ZIF-67 derived nanocages and Co<sub>3</sub>O<sub>4</sub> in LSBs.

## References

1. J. Zhao, C. Liu, H. Deng, S. Tang, C. Liu, S. Chen, J. Guo, Q. Lan, Y. Li, Y. Liu, M. Ye, H. Liu, J. Liang and Y.-C. Cao, *Materials Today Energy*, 2018, **8**, 134-142.
2. J. Xu, W. Zhang, Y. Chen, H. Fan, D. Su and G. Wang, *J. Mater Chem. A*, 2018, **6**, 2797-2807.
3. L. Zhou, H. Li, X. Wu, Y. Zhang, D. L. Danilov, R.-A. Eichel and P. H. L. Notten, *ACS Appl Mater Interfaces*, 2019, **2**, 8153-8162.
4. Z. Zhou, Y. Li, T. Fang, Y. Zhao, Q. Wang, J. Zhang and Z. Zhou, *Nanomaterials (Basel)*, 2019, **9**, 1574.
5. Y. Q. Lu, Y. J. Wu, T. Sheng, X. X. Peng, Z. G. Gao, S. J. Zhang, L. Deng, R. Nie, J. Swiatowska, J. T. Li, Y. Zhou, L. Huang, X. D. Zhou and S. G. Sun, *ACS Appl Mater Interfaces*, 2018, **10**, 13499-13508.
6. Z. Li, C. Li, X. Ge, J. Ma, Z. Zhang, Q. Li, C. Wang and L. Yin, *Nano Energy*, 2016, **23**, 15-26.
7. D. Xiao, Q. Li, H. Zhang, Y. Ma, C. Lu, C. Chen, Y. Liu and S. Yuan, *J. Mater Chem. A*, 2017, **5**, 24901-24908.
8. J. He, Y. Chen, W. Lv, K. Wen, C. Xu, W. Zhang, Y. Li, W. Qin and W. He, *ACS Nano*, 2016, **10**, 10981-10987.
9. Y. Chen and X. Ji, *J. Phys. Chem. C*, 2019, **777**, 688-692.
10. Z. Chang, H. Dou, B. Ding, J. Wang, Y. Wang, X. Hao and D. R. MacFarlane, *J. Mater Chem. A*, 2017, **5**, 250-257.
11. F. Ma, J. Liang, T. Wang, X. Chen, Y. Fan, B. Hultman, H. Xie, J. Han, G. Wu and Q. Li, *Nanoscale*, 2018, **10**, 5634-5641.
12. C.-Y. Fan, S.-Y. Liu, H.-H. Li, Y.-H. Shi, H.-C. Wang, H.-F. Wang, H.-Z. Sun, X.-L. Wu and J.-P. Zhang, *J. Mater Chem. A*, 2017, **5**, 11255-11262.
13. J. Wang, C. Wang and M. Zhen, *Chem. Eng. J.*, 2019, **356**, 1-10.
14. S. Wang, X. Hou, Z. Zhong, K. Shen, G. Zhang, L. Yao and F. Chen, *Sci Rep*, 2018, **8**, 16133.



15. J. Wang, W. Wang, Y. Zhang, Z. Bakenov, Y. Zhao and X. Wang, *Mater. Lett.*, 2019, **255**, 126581.
16. W. Tang, Y. Zhang, W. Zhong, M. K. Aslam, B. Guo, S. J. Bao and M. Xu, *Nanoscale*, 2019, **11**, 14648-14653.
